# Supplementary material for: Self-assembly of DNA nanoprisms with only two component strands
Source: Royal Society of Chemistry journal article supplement (doi:10.1039/c3cc39177a), 2013-01-01
Supplement: c3cc39177a.pdf [file c3cc39177a.pdf]

# Supplementary Material (ESI) for Chemical Communications

# This journal is (c) The Royal Society of Chemistry 2010

# Self-Assembly of DNA Nanoprisms with Only Two Component Strands

Zhou Nie,<sup>a,b</sup> Xiang Li<sup>b</sup>, Yingmei Li<sup>b</sup>, Cheng Tian<sup>b</sup>, Pengfei Wang<sup>b</sup>, and Chengde Mao (毛成德)<sup>b\*</sup>

<sup>a</sup> State Key Laboratory of Chemo/Biosensing and Chemometrics, College of Chemistry and Chemical Engineering, Hunan University, Changsha, 410082, P. R. China; <sup>b</sup> Department of Chemistry, Purdue University, West Lafayette, Indiana 47907, USA. E-mail: mao@purdue.edu.

## Supplementary Information

### Materials and Methods

**Oligonucleotides.** DNA oligonucleotides were designed by a computer program "SEQUIN" (N. C. Seeman, *J. Biomol. Struct. Dyn.* 1990, **8**, 573-581.), purchased from Integrated DNA Technologies, Inc., and purified by denaturing polyacrylamide gel electrophoresis (PAGE).

DNA sequence (underlined bases are the hinges):

$L_3$ -nT: 5' - [AGGCACCATCG (T)<sub>n</sub>AGGTCTTGCC]<sub>3</sub> -3' (n = 0-1);  
 $L_k$ : 5' - (AGGCACCATCG T AGGTCTTGCC)<sub>k</sub> -3' (k = 3-6);  
Sc-nT: 5' - CGATGGTGCCTGGCAAGACCT (T)<sub>n</sub>TGAGCGCTCA-3' (n = 0-3);  
Sa: 5' - CGATGGTGCCTGGCAAGACCT T TCCGAACTGA-3';  
Sb: 5' - CGATGGTGCCTGGCAAGACCT T TCAGTTCGGA-3';

**Formation of DNA complexes.** DNA strands were combined according to the correct molecular ratios in a tris-acetic-EDTA-Mg<sup>2+</sup> (TAE/Mg<sup>2+</sup>) buffer, which consisted of Tris (40 mM, pH 8.0), acetic acid (20 mM), EDTA (2 mM), and Mg(CH<sub>3</sub>COO)<sub>2</sub> (12.5 mM). All hetero-prisms used the corresponding central strands  $L_k$ , and short strands Sa and Sb. The prism construction followed two-step self-assembly: (1) polygonal face motif formation: the mixture of  $L_k$  strand and Sa (or Sb) was annealed: 95 °C / 5 min, 65 °C / 30 min, 50 °C / 30 min, 37 °C / 30 min, 22 °C / 30 min, and 4 °C / 30 min; (2) prism formation: motif  $L_k$  / Sa and motif  $L_k$  / Sb were mixed together at 1:1 ratio and then re-annealed: 50 °C / 30 min, 37 °C / 30 min, 22 °C / 30 min, and 4 °C / 30 min. Homo-prisms were assembled a one-pot process: cooling solution of the  $L_k$  / Sc-nT (m = 0-3) at ratio 1:k: 95 °C / 5 min; 65 °C / 45 min; 50 °C / 45 min; 37 °C / 45 min; 22 °C / 45 min; and 4 °C / 45 min. DNA concentrations were used as indicated in Figs. 2-4 unless specifically stated otherwise. DNA samples were then directly used for characterization, without further fractionation or purification.

**Native PAGE.** Gels contained 6% polyacrylamide (19:1 acrylamide/bisacrylamide) and were run on a SE-600 electrophoresis unit (18 cm × 16 cm, Hoefer) at 4°C (250 V, constant voltage). The running buffer of the electrophoresis was TAE/Mg<sup>2+</sup> buffer. After electrophoresis, the gels were stained with Stains-all dye (Sigma) and scanned by a HP office scanner. The band intensity was estimated by Image J, an NIH-developed image-processing computer software.
